# Supplementary material for: Low-cost high-performance asymmetric supercapacitors based on Co2AlO4@MnO2 nanosheets and Fe3O4 nanoflakes
Source: Royal Society of Chemistry journal article supplement (doi:10.1039/c5ta09914e), 2015-12-22

**Fig. S1.** SEM image of  $\text{Fe}_3\text{O}_4$  particles and NF- $\text{Fe}_3\text{O}_4$

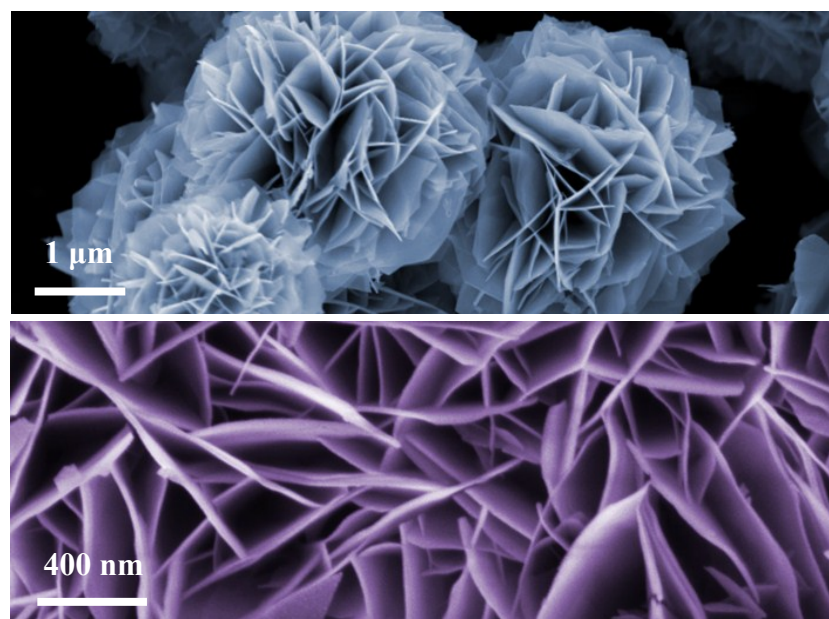

**Fig. S2.** (a) CV curves of the ASC device at different voltage windows at a scan rate of  $100 \text{ mV s}^{-1}$ . (b) Galvanostatic charge-discharge tests of the ASC device.

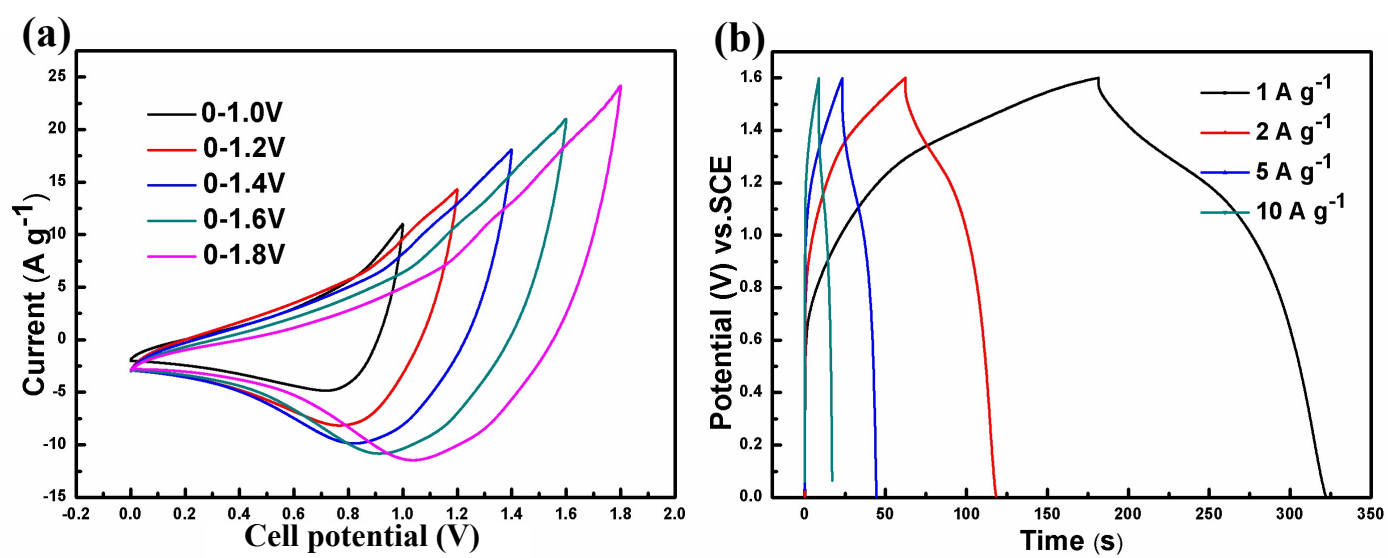

**Fig. S3.** The CV curves under (at current density 50mV/s) different bending conditions.

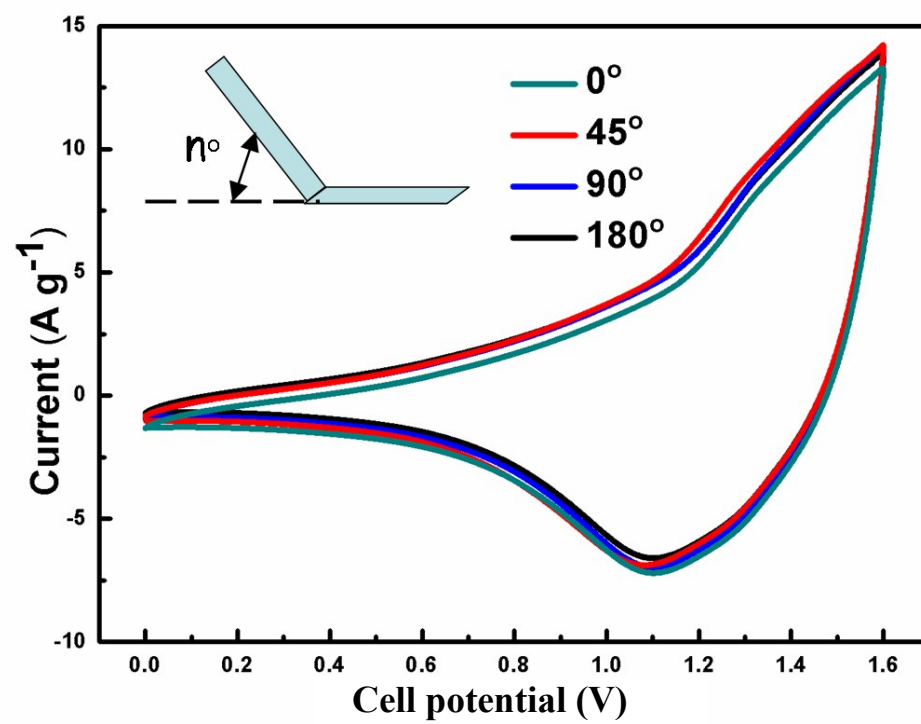

**Fig. S4.** Nyquist plots of the NF-Co<sub>2</sub>AlO<sub>4</sub>@MnO<sub>2</sub> // NF-Fe<sub>3</sub>O<sub>4</sub> full device.

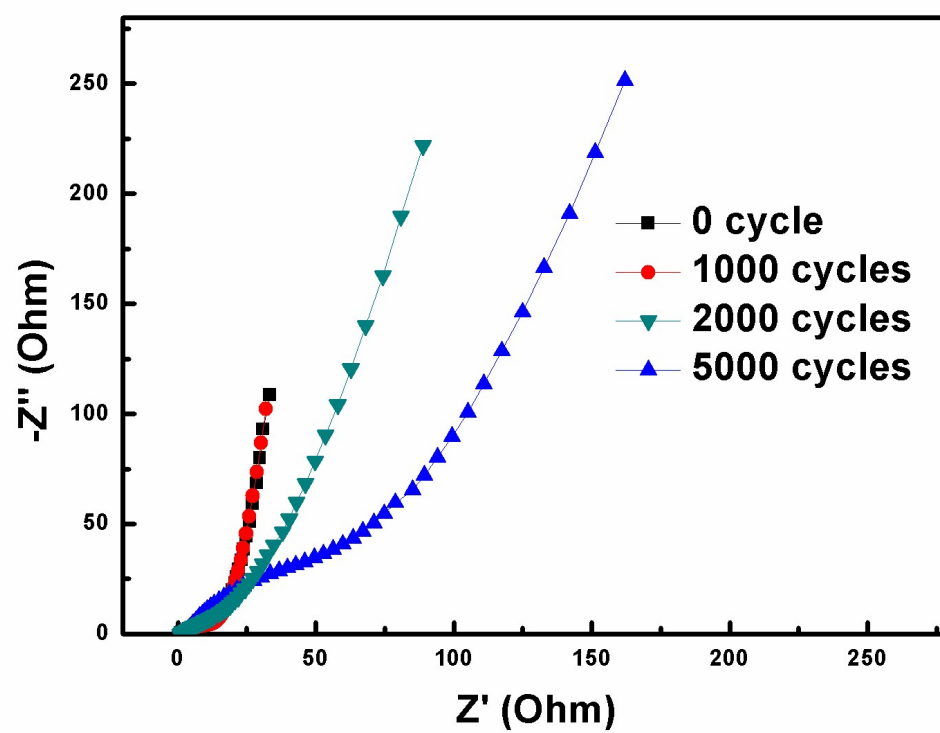

Supplement: c5ta09914e1.pdf [file c5ta09914e1.pdf]
